# Supplementary material
Source: publisher figshare collection journal article supplement (https://tandf.figshare.com/ndownloader/files/15631355)
Supplement: Supplementary file 1 [file 15631355]

Data set can be found in the link below:

https://hdl.handle.net/10411/QQE3VA
